# Supplementary material for: Serotypes, virulence factors and multilocus sequence typing of Glaesserella parasuis from diseased pigs in Taiwan
Source: PeerJ. 2023 Sep 29;11:e15823. doi: 10.7717/peerj.15823 (PMC10544350; doi:10.7717/peerj.15823)
Supplement: Supplemental Information 3 [file peerj-11-15823-s003.xlsx]

## Sheet: submission
	https://pubmlst.org/bigsdb?db=pubmlst_hparasuis_isolates&page=query&prov_field1=f_country&prov_value1=Taiwan&submit=1
number	id	isolate	site	disease	country	atpD	infB	mdh	rpoB	6pgd	g3pd	frdB	ST
1	678	GP2	lung		Taiwan	26	29	53	1	63	3	52	614
2	679	GP3	joint		Taiwan	26	29	53	1	63	3	52	614
3	680	GP6	joint		Taiwan	26	29	53	1	45	3	52	593
4	681	GP8	joint		Taiwan	33	48	34	1	1	1	3	607
5	682	GP9	lung		Taiwan	26	54	8	1	43	1	54	598
6	683	GP21	lung		Taiwan	26	1	6	1	1	1	2	577
7	684	GP22	lung		Taiwan	26	2	4	1	3	3	19	583
8	685	GP25	brain		Taiwan	26	2	4	1	3	3	19	583
9	686	GP30	joint		Taiwan	26	11	44	1	64	1	56	586
10	687	GP31	joint		Taiwan	26	9	6	1	45	1	57	585
11	688	GP35	lung		Taiwan	7	29	37	1	43	1	3	568
12	689	GP43	thoracic cavity		Taiwan	2	50	4	1	65	3	17	558
13	690	GP44	thoracic cavity		Taiwan	2	23	34	1	43	1	60	557
14	691	GP45	lung		Taiwan	2	23	34	1	43	1	60	557
15	692	GP46	lung		Taiwan	26	1	69	1	43	1	60	578
16	693	GP47	thoracic cavity		Taiwan	38	4	12	1	66	1	2	610
17	694	GP57	joint		Taiwan	26	11	12	1	45	1	58	587
18	695	GP59	lung		Taiwan	2	11	34	1	64	1	19	555
19	696	GP69	pericardium		Taiwan	24	1	47	1	64	1	65	576
20	697	GP81	joint	polyserositis	Taiwan	39	61	45	1	43	1	61	611
21	698	GP88	lung	polyserositis	Taiwan	41	17	34	1	75	3	78	612
22	699	GP93	joint	polyserositis	Taiwan	39	61	45	1	43	1	61	611
23	700	GP95	lung	polyserositis	Taiwan	26	1	37	1	45	1	70	579
24	701	GP102	lung	polyserositis	Taiwan	26	64	52	1	43	1	79	600
25	702	GP103	pericardium	polyserositis	Taiwan	2	11	41	1	43	1	4	556
26	703	GP105	pericardium	polyserositis	Taiwan	7	12	34	1	1	1	3	567
27	704	GP121	lung		Taiwan	7	75	53	1	45	1	3	574
28	705	GP162	lung	polyserositis	Taiwan	7	1	6	1	1	1	3	562
29	706	GP172	lung	pneumonia	Taiwan	26	11	54	1	45	3	78	588
30	707	GP174	lung	polyserositis	Taiwan	26	1	34	1	1	1	71	580
31	708	GP178	abdominal cavity	pneumonia	Taiwan	30	11	70	1	45	1	77	605
32	709	GP180	joint		Taiwan	30	11	70	1	45	1	77	605
33	710	GP181	joint		Taiwan	30	11	70	1	45	1	77	605
34	711	GP183	joint	polyserositis	Taiwan	28	56	53	1	1	1	2	604
35	712	GP184	joint	pneumonia	Taiwan	26	11	54	1	45	3	78	588
36	713	GP185	lung	pneumonia	Taiwan	26	50	34	1	45	1	98	597
37	714	GP189	lung	polyserositis	Taiwan	7	1	6	1	1	1	3	562
38	715	GP194	lung	polyserositis	Taiwan	7	64	34	1	1	1	3	570
39	716	GP200	lung	polyserositis	Taiwan	7	11	54	1	1	3	60	565
40	717	GP201	lung	pneumonia	Taiwan	26	29	53	1	45	3	23	594
41	718	GP212	lung	polyserositis	Taiwan	37	1	37	1	1	1	68	609
42	719	GP213	lung	pneumonia	Taiwan	26	76	51	1	45	1	60	602
43	720	GP218	lung	polyserositis	Taiwan	7	64	34	1	103	1	6	571
44	721	GP219	lung	polyserositis	Taiwan	26	1	53	1	9	1	3	581
45	722	GP223	lung		Taiwan	5	4	53	1	45	1	44	560
46	723	GP233	lung	polyserositis	Taiwan	26	11	54	1	45	3	60	589
47	724	GP235	lung	pneumonia	Taiwan	33	11	34	1	3	3	99	606
48	725	GP236	lung	pneumonia	Taiwan	26	23	6	1	3	1	53	592
49	726	GP237	lung	pneumonia	Taiwan	7	64	34	1	1	3	3	572
50	727	GP240	lung	polyserositis	Taiwan	7	4	69	1	1	26	62	563
51	728	GP250	joint	polyserositis	Taiwan	26	1	46	1	45	1	55	582
52	729	GP258	lung	pneumonia	Taiwan	2	9	34	1	1	3	78	554
53	730	GP261	brain	meningitis	Taiwan	7	4	69	1	1	26	62	563
54	731	GP264	lung	polyserositis	Taiwan	7	76	48	1	52	1	3	575
55	732	GP265	pericardium	pneumonia	Taiwan	26	64	53	1	43	1	79	601
56	733	GP266	lung	polyserositis	Taiwan	26	63	37	1	1	1	3	599
57	734	GP267	lung	polyserositis	Taiwan	7	50	37	1	1	1	3	569
58	735	GP268	thoracic cavity	polyserositis	Taiwan	26	63	37	1	1	1	3	599
59	736	GP269	joint	polyserositis	Taiwan	26	63	37	1	1	1	3	599
60	737	GP274	lung	polyserositis	Taiwan	26	63	37	1	1	1	3	599
61	738	GP275	joint	polyserositis	Taiwan	7	50	37	1	1	1	3	569
62	739	GP276	lung	pneumonia	Taiwan	7	11	54	1	45	1	11	566
63	740	GP283	lung		Taiwan	26	77	34	1	1	1	100	603
64	741	GP287	lung	pneumonia	Taiwan	7	64	34	1	103	3	6	573
65	742	GP294	lung	pneumonia	Taiwan	26	48	12	1	66	3	17	595
66	743	GP304	lung	pneumonia	Taiwan	53	1	12	1	104	1	3	613
67	744	GP306	lung	polyserositis	Taiwan	2	71	1	1	36	1	3	559
68	745	GP316	lung	pneumonia	Taiwan	26	4	6	1	43	3	2	584
69	746	GP323	lung		Taiwan	33	76	4	32	12	1	3	608
70	747	GP326	lung	pneumonia	Taiwan	7	10	69	1	45	3	60	564
71	748	GP335	lung	pneumonia	Taiwan	26	11	54	1	45	3	60	589
72	749	GP337	lung	pneumonia	Taiwan	26	11	53	1	45	3	60	590
73	750	GP341	lung	polyserositis	Taiwan	26	48	53	1	45	1	60	596
74	751	GP349	lung	polyserositis	Taiwan	26	11	51	1	45	1	60	591
75	752	GP370	lung	pneumonia	Taiwan	5	15	34	1	67	1	60	561
76	753	GP314	lung	pneumonia	Taiwan	7	4	34	1	45	1	101	615
77	754	GP344	lung	pneumonia	Taiwan	7	40	71	1	1	3	102	616
78	762	GP296	lung	polyserositis	Taiwan	26	78	34	1	68	1	55	619
79	763	GP127	lung		Taiwan	7	79	34	1	1	1	3	620
80	764	GP61	lung		Taiwan	26	11	12	1	45	1	55	621
81	765	GP29	brain		Taiwan	26	11	44	1	64	1	56	586
82	766	GP165	brain	polyserositis	Taiwan	7	1	6	1	1	1	3	562
83	767	GP222	brain	polyserositis	Taiwan	5	4	53	1	45	1	44	560
84	768	GP313	brain	polyserositis	Taiwan	26	11	51	1	45	1	60	591
85	769	GP322	brain	polyserositis	Taiwan	4	1	34	1	45	1	60	622
86	770	GP345	brain	polyserositis	Taiwan	7	50	37	1	1	1	3	569
87	771	GP368	brain	polyserositis	Taiwan	5	76	37	1	1	1	45	623
